# Supplementary material
Source: PubMed Central journal article supplement (PMC9960437)
Supplement: 40001_2023_1072_MOESM2_ESM.pdf [file 40001_2023_1072_MOESM2_ESM.pdf]

## **Supplementary Information No 2 Search strategies**

### **Cochrane COVID-19 Study Register**

#### **Search string:**

Anakinra OR "IL1 Febrile Inhibitor" OR "Interleukin 1 Inhibitor" OR Anril OR Kineret OR "Interleukin 1 Receptor Antagonist" OR "IL-1Ra" OR "IL-1 Inhibitor" OR "IL 1Ra" OR "IL 1 Inhibitor"

#### **Study characteristics:**

- 1) "Intervention assignment": "Randomised" OR "Unclear" OR
- 2) "Study type": "Interventional" AND "Study design": "Parallel/Crossover"
- 3) "Study type": "Interventional" AND "Study design": "Unclear"
- 4) "Study type": "Adaptive/Platform"

= 92 references

### **WHO COVID-19 Global literature on coronavirus disease**

Title, abstract, subject:

(Anakinra OR "IL1 Febrile Inhibitor" OR "Interleukin 1 Inhibitor" OR Anril OR Kineret OR "Interleukin 1 Receptor Antagonist" OR "IL-1Ra" OR "IL-1 Inhibitor" OR "IL 1Ra" OR "IL 1 Inhibitor") AND (random\* OR placebo OR trial OR groups OR "phase 3" or "phase3" or p3 or "pIII")

= 147 references
