# Supplementary material
Source: PubMed Central journal article supplement (PMC9960437)
Supplement: 40001_2023_1072_MOESM3_ESM.pdf [file 40001_2023_1072_MOESM3_ESM.pdf]

### Supplementary Information No 3 Records excluded during full-text screening

| Author                                                   | Year | Title                                                                                                                                              | Type                | Reason for exclusion in full-text screening |
|----------------------------------------------------------|------|----------------------------------------------------------------------------------------------------------------------------------------------------|---------------------|---------------------------------------------|
| Assistance Publique Hopitaux De Marseille<br>NCT04424056 | 2020 | A Trial Using ANAKINRA, TOCILIZUMAB Alone or in Association With RUXOLITINIB in Severe Stage 2b and 3 of COVID19-associated Disease                | Trial registry      | Wrong intervention                          |
| Kyriazopoulou et al.<br>Preprint                         | 2020 | Anakinra To Prevent Respiratory Failure In COVID-19                                                                                                | Preprint            | Wrong study design                          |
| Kyriazopoulou et al.                                     | 2021 | An open label trial of anakinra to prevent respiratory failure in COVID-19                                                                         | Journal publication | Wrong study design                          |
| University of Manchester<br>EUCTR2020-001636-95-GB       | 2020 | Does subcutaneously(SC) administered of anakinra achieve good penetration in blood and result in reduce inflammation in patients with SARS-CoV-19? | Trial registry      | Wrong comparator                            |
| Swedish Orphan Biovitrum<br>EUCTR2020-001167-93          | 2020 | A clinical trial investigating efficacy and safety of emapalumab and anakinra in patients with Coronavirus disease (COVID-19)                      | Trial registry      | Wrong comparator                            |
| Kaplanski G, Bontemps D, Esnault P, et al.               | 2020 | Combined Anakinra and Ruxolitinib treatment to rescue extremely ill COVID-19 patients: a pilot study                                               | Journal publication | Wrong comparator                            |
| Swedish Orphan Biovitrum<br>NCT04324021                  | 2020 | Efficacy and Safety of Emapalumab and Anakinra in Reducing Hyperinflammation and Respiratory Distress in Patients With COVID-19 Infection          | Trial registry      | Trial terminated                            |

|                                                                               |      |                                                                                                                                                      |                |                    |
|-------------------------------------------------------------------------------|------|------------------------------------------------------------------------------------------------------------------------------------------------------|----------------|--------------------|
| University Hospital Tours<br>NCT04364009                                      | 2020 | Anakinra for COVID-19 Respiratory Symptoms                                                                                                           | Trial registry | Trial terminated   |
| Centre Hospitalier Intercommunal<br>de Toulon La Seyne sur Mer<br>NCT04366232 | 2020 | Efficacy of Intravenous Anakinra and Ruxolitinib During COVID-19<br>Inflammation (JAKINCOV)                                                          | Trial registry | Trial terminated   |
| CHRU de TOURS<br>EUCTR2020-001734-36                                          | 2020 | Efficacy and safety of ANakinra during Adult COVID-19 with Aggravating<br>respiratory symptoms: a multicenter open-label controlled randomized trial | Trial registry | Trial terminated   |
| Weill Medical College of Cornell<br>University<br>NCT04603742                 | 2020 | Anakinra, COVID-19, Cytokine Storm                                                                                                                   | Trial registry | Registry withdrawn |
