# Supplementary material
Source: PubMed Central journal article supplement (PMC9960437)
Supplement: 40001_2023_1072_MOESM4_ESM.pdf [file 40001_2023_1072_MOESM4_ESM.pdf]

## Supplementary Information No 4 Characteristics of included studies

| Declercq 2021                                                                                                                                                                                                                                  |                         |                                                                                                                                                                                                                                                                                                                                                                                                                                                                                                                                                                                                                                                                                                                                                                                                                                                                                                                                                                                                                                                                                                                                                                                                                                                                                                                                                                                                                                                                                                                                                                                                                  |                                                                                                                                                                                                                                                  |                                                |                                                                                                                                                                                                                                                                                                                                                                                                                                                                                                                                                                                                                                                                                                                                                                                                                                               |                                                                                                                                                                                                                                                                                                                                                                                                                                                                                                                                                                                                                                                                                                                                                                                                                                                               |
|------------------------------------------------------------------------------------------------------------------------------------------------------------------------------------------------------------------------------------------------|-------------------------|------------------------------------------------------------------------------------------------------------------------------------------------------------------------------------------------------------------------------------------------------------------------------------------------------------------------------------------------------------------------------------------------------------------------------------------------------------------------------------------------------------------------------------------------------------------------------------------------------------------------------------------------------------------------------------------------------------------------------------------------------------------------------------------------------------------------------------------------------------------------------------------------------------------------------------------------------------------------------------------------------------------------------------------------------------------------------------------------------------------------------------------------------------------------------------------------------------------------------------------------------------------------------------------------------------------------------------------------------------------------------------------------------------------------------------------------------------------------------------------------------------------------------------------------------------------------------------------------------------------|--------------------------------------------------------------------------------------------------------------------------------------------------------------------------------------------------------------------------------------------------|------------------------------------------------|-----------------------------------------------------------------------------------------------------------------------------------------------------------------------------------------------------------------------------------------------------------------------------------------------------------------------------------------------------------------------------------------------------------------------------------------------------------------------------------------------------------------------------------------------------------------------------------------------------------------------------------------------------------------------------------------------------------------------------------------------------------------------------------------------------------------------------------------------|---------------------------------------------------------------------------------------------------------------------------------------------------------------------------------------------------------------------------------------------------------------------------------------------------------------------------------------------------------------------------------------------------------------------------------------------------------------------------------------------------------------------------------------------------------------------------------------------------------------------------------------------------------------------------------------------------------------------------------------------------------------------------------------------------------------------------------------------------------------|
| Declercq J, van Damme KFA, De Leeuw E, et al: Effect of anti-interleukin drugs in patients with COVID-19 and signs of cytokine release syndrome (COV-AID): a factorial, randomised, controlled trial. <i>Lancet Respir Med</i> 2021; 9:1427–38 |                         |                                                                                                                                                                                                                                                                                                                                                                                                                                                                                                                                                                                                                                                                                                                                                                                                                                                                                                                                                                                                                                                                                                                                                                                                                                                                                                                                                                                                                                                                                                                                                                                                                  |                                                                                                                                                                                                                                                  |                                                |                                                                                                                                                                                                                                                                                                                                                                                                                                                                                                                                                                                                                                                                                                                                                                                                                                               |                                                                                                                                                                                                                                                                                                                                                                                                                                                                                                                                                                                                                                                                                                                                                                                                                                                               |
| Design                                                                                                                                                                                                                                         | Study period and place  | Participants                                                                                                                                                                                                                                                                                                                                                                                                                                                                                                                                                                                                                                                                                                                                                                                                                                                                                                                                                                                                                                                                                                                                                                                                                                                                                                                                                                                                                                                                                                                                                                                                     | Intervention                                                                                                                                                                                                                                     | Control                                        | Outcomes                                                                                                                                                                                                                                                                                                                                                                                                                                                                                                                                                                                                                                                                                                                                                                                                                                      | Conclusion                                                                                                                                                                                                                                                                                                                                                                                                                                                                                                                                                                                                                                                                                                                                                                                                                                                    |
| Randomized controlled trial, 2x2 factorial design, open-label, Inpatient                                                                                                                                                                       | 16 hospitals in Belgium | <p><b>Patients:</b><br/> N<sup>Total</sup>: 118 (with other interventions: 342)<br/> A: n = 43<sup>1</sup><br/> C: n = 72<br/> Excluded:<br/> Not reported for Anakinra and control only</p> <p><u>Follow-up:</u><br/> 10-20 weeks after randomization</p> <p><b>Inclusion criteria:</b></p> <ul style="list-style-type: none"> <li>- Recent infection with COVID-19</li> <li>- Presence of hypoxia</li> <li>- Signs of cytokine release syndrome</li> <li>- Chest x-ray and/or CT scan showing bilateral infiltrates within last 2 days</li> <li>- Admitted to specialized COVID-19 ward or an ICU ward taking care of COVID-19 patients</li> <li>- <math>\geq</math> 18 years</li> <li>- Male or female</li> <li>- Women of childbearing potential must have a negative serum pregnancy test pre-dose on day 1</li> <li>- Willing and able to provide informed consent or legal representative willing to provide informed consent</li> </ul> <p><b>Exclusion criteria:</b></p> <ul style="list-style-type: none"> <li>- Patients with known history of serious allergic reactions, including anaphylaxis to any of the study medications, or any component of the product</li> <li>- Mechanical ventilation &gt; 24h at randomization</li> <li>- Patient on ECMO at time of screening</li> <li>- Clinical frailty scale above 3</li> <li>- Active bacterial or fungal infection</li> <li>- Unlikely to survive beyond 48 h</li> <li>- Neutrophil count below 1500 cells/microliter</li> <li>- Platelets below 50.000/microliter</li> <li>- Patients enrolled in another investigational drug study</li> </ul> | <p><b>Anakinra</b><br/> 1x/day 100mg subcutaneously for 28 days or until hospital discharge on top of standard of care</p> <p>If glomerular filtration rate &lt;30 ml/min per 1,73 m2, the dosing was lowered to 100mg once every other day.</p> | <p><b>Standard of Care</b> (not specified)</p> | <p><b>Primary outcome:</b><br/> <u>Time to clinical improvement</u><br/> Number of deaths<br/> A: 10/44 (23%)<br/> C: 9/74 (12%)</p> <p><b>Secondary outcomes:</b></p> <ul style="list-style-type: none"> <li>- Median time until discharge (IQR)<br/> A: 14 (9-37)<br/> C: 12 (10-20)</li> <li>- Median time until independence from supplemental oxygen or discharge<br/> A: 14 (8-20)<br/> C: 11 (10-15)</li> <li>- Median time until independence from invasive ventilation<br/> A: &lt;50% reached event<br/> C: 54 (6-.)</li> <li>- Median time until first use of high-flow oxygen device, ventilation or death<br/> A: &lt;50% reached event<br/> C: &lt;50% reached event</li> <li>- Number of days in hospital<br/> A: 20 (16-25)<br/> C: 18 (15-22)</li> <li>- Number of days in ICU<br/> A: 12 (7-21)<br/> C: 9 (6-14)</li> </ul> | <p>No shortening of time to clinical improvement or improvement of supportive endpoints when given early in disease course of hypoxia patients with COVID-19 with evidence of CRS.<br/> No increase in infectious adverse events or other safety concerns associated with use of Anakinra.</p> <p><b>Comments:</b><br/> <u>Limitations:</u></p> <ul style="list-style-type: none"> <li>- Open-label design</li> <li>- Standard of care could differ among centres and did change during the course of the trial</li> <li>- small sample size</li> <li>- total number of patients screened for eligibility not registered in all centres</li> <li>- decision to exclude patients unlikely to survive beyond 48h made by the individual enrolling physician on clinical grounds without objective criteria beyond the use of a frailty scoring index</li> </ul> |

## Supplementary Information No 4 Characteristics of included studies

| <b>Declercq 2021</b>                                                                                                                                                                                                                                                                                                                                              |                          |                                                                                                                                                                                                                                                                                                                                                                                                                                                                                                                                                                                                                                                                                                                                                                                                                                                                                                                                                                                                                                                                                                                                                                                                                                                                       |                                              |                                         |                                                                 |                                                                        |
|-------------------------------------------------------------------------------------------------------------------------------------------------------------------------------------------------------------------------------------------------------------------------------------------------------------------------------------------------------------------|--------------------------|-----------------------------------------------------------------------------------------------------------------------------------------------------------------------------------------------------------------------------------------------------------------------------------------------------------------------------------------------------------------------------------------------------------------------------------------------------------------------------------------------------------------------------------------------------------------------------------------------------------------------------------------------------------------------------------------------------------------------------------------------------------------------------------------------------------------------------------------------------------------------------------------------------------------------------------------------------------------------------------------------------------------------------------------------------------------------------------------------------------------------------------------------------------------------------------------------------------------------------------------------------------------------|----------------------------------------------|-----------------------------------------|-----------------------------------------------------------------|------------------------------------------------------------------------|
| Declercq J, van Damme KFA, De Leeuw E, et al: Effect of anti-interleukin drugs in patients with COVID-19 and signs of cytokine release syndrome (COV-AID): a factorial, randomised, controlled trial. <i>Lancet Respir Med</i> 2021; 9:1427–38                                                                                                                    |                          |                                                                                                                                                                                                                                                                                                                                                                                                                                                                                                                                                                                                                                                                                                                                                                                                                                                                                                                                                                                                                                                                                                                                                                                                                                                                       |                                              |                                         |                                                                 |                                                                        |
| Design                                                                                                                                                                                                                                                                                                                                                            | Study period and place   | Participants                                                                                                                                                                                                                                                                                                                                                                                                                                                                                                                                                                                                                                                                                                                                                                                                                                                                                                                                                                                                                                                                                                                                                                                                                                                          | Intervention                                 | Control                                 | Outcomes                                                        | Conclusion                                                             |
|                                                                                                                                                                                                                                                                                                                                                                   |                          | <ul style="list-style-type: none"> <li>– Patients on high dose systemic steroids</li> <li>– Patients on immunosuppressant or immunomodulatory drugs</li> <li>– Patients on current anti-IL1 or anti-IL6 treatment</li> <li>– Signs of active tuberculosis</li> <li>– Serum transaminase levels &gt;5times upper limit of normal, unless there are clear signs of cytokine release syndrome</li> <li>– History of (non-iatrogenic) bowel perforation or diverticulitis</li> <li>– Pregnant or breastfeeding females</li> </ul> <p><b>Demographics:</b><br/> <u>Age, median (IQR):</u><br/>                     A: 65 (54 - 70)<br/>                     C: 63 (56 - 73)<br/> <u>Male, n (%)</u><br/>                     A: 37 (86)<br/>                     C: 53 (74)<br/> <b>Severity of condition according to respiratory support (n/N (%)):</b><br/>                     IMV:<br/>                     A: 8/43 (19); C: 9/72 (13)<br/>                     non-IMV:<br/>                     A: 16/43 (37); C: 23/72 (32)<br/>                     supplemental oxygen only<sup>2</sup>:<br/>                     A: 19/43 (44); C: 39/72 (54)<br/>                     Not requiring supplemental oxygen:<br/>                     A: 0/43 (0); C: 1/72 (1)</p> |                                              |                                         |                                                                 |                                                                        |
| <sup>1</sup> characteristics of the patients at baseline available for A: 43, C: 72; outcomes partially available for A: 44, C: 74                                                                                                                                                                                                                                |                          |                                                                                                                                                                                                                                                                                                                                                                                                                                                                                                                                                                                                                                                                                                                                                                                                                                                                                                                                                                                                                                                                                                                                                                                                                                                                       |                                              |                                         |                                                                 |                                                                        |
| <sup>2</sup> without differentiation between low and high flow                                                                                                                                                                                                                                                                                                    |                          |                                                                                                                                                                                                                                                                                                                                                                                                                                                                                                                                                                                                                                                                                                                                                                                                                                                                                                                                                                                                                                                                                                                                                                                                                                                                       |                                              |                                         |                                                                 |                                                                        |
| <b>Derde 2021</b>                                                                                                                                                                                                                                                                                                                                                 |                          |                                                                                                                                                                                                                                                                                                                                                                                                                                                                                                                                                                                                                                                                                                                                                                                                                                                                                                                                                                                                                                                                                                                                                                                                                                                                       |                                              |                                         |                                                                 |                                                                        |
| The REMAPCAP Investigators: Effectiveness of Tocilizumab, Sarilumab, and Anakinra for critically ill patients with COVID-19 The REMAP-CAP COVID-19 Immune Modulation Therapy Domain Randomized Clinical Trial. medRxiv [Preprint] 2021.06.18.21259133; doi: <a href="https://doi.org/10.1101/2021.06.18.21259133">https://doi.org/10.1101/2021.06.18.21259133</a> |                          |                                                                                                                                                                                                                                                                                                                                                                                                                                                                                                                                                                                                                                                                                                                                                                                                                                                                                                                                                                                                                                                                                                                                                                                                                                                                       |                                              |                                         |                                                                 |                                                                        |
| Design                                                                                                                                                                                                                                                                                                                                                            | Study period and place   | Participants                                                                                                                                                                                                                                                                                                                                                                                                                                                                                                                                                                                                                                                                                                                                                                                                                                                                                                                                                                                                                                                                                                                                                                                                                                                          | Intervention (Anakinra, A)                   | Control (C)                             | Outcomes                                                        | Conclusion of study authors                                            |
| Randomized controlled trial,                                                                                                                                                                                                                                                                                                                                      | 19.04.2020 - 10.04.2021, | <b>Patients:</b><br>screened: n = 13,718<br>randomised to a COVID-19 Immune                                                                                                                                                                                                                                                                                                                                                                                                                                                                                                                                                                                                                                                                                                                                                                                                                                                                                                                                                                                                                                                                                                                                                                                           | <b>Anakinra (A)</b><br>300mg IV loading dose | <b>Standard of Care</b> (not specified) | <b>Primary outcome<sup>1</sup>:</b><br>In-hospital death, n (%) | “Anakinra is not effective in this population”<br><br><b>Comments:</b> |

## Supplementary Information No 4 Characteristics of included studies

| <b>Declercq 2021</b>                                                                                                                                                                                                                           |                                                                                                                                                                                                      |                                                                                                                                                                                                                                                                                                                                                                                                                                                                                                                                                                                                                                                                                                                                                                                                                                                                                                                                                                                                                                                                                                                                                                                                                                                                                                                                                                                                                                                                                                                         |                                                                                                                                                                                                                       |                |                                                                                                                                                                                                                                                                                                                                                                                                                                 |                                                    |
|------------------------------------------------------------------------------------------------------------------------------------------------------------------------------------------------------------------------------------------------|------------------------------------------------------------------------------------------------------------------------------------------------------------------------------------------------------|-------------------------------------------------------------------------------------------------------------------------------------------------------------------------------------------------------------------------------------------------------------------------------------------------------------------------------------------------------------------------------------------------------------------------------------------------------------------------------------------------------------------------------------------------------------------------------------------------------------------------------------------------------------------------------------------------------------------------------------------------------------------------------------------------------------------------------------------------------------------------------------------------------------------------------------------------------------------------------------------------------------------------------------------------------------------------------------------------------------------------------------------------------------------------------------------------------------------------------------------------------------------------------------------------------------------------------------------------------------------------------------------------------------------------------------------------------------------------------------------------------------------------|-----------------------------------------------------------------------------------------------------------------------------------------------------------------------------------------------------------------------|----------------|---------------------------------------------------------------------------------------------------------------------------------------------------------------------------------------------------------------------------------------------------------------------------------------------------------------------------------------------------------------------------------------------------------------------------------|----------------------------------------------------|
| Declercq J, van Damme KFA, De Leeuw E, et al: Effect of anti-interleukin drugs in patients with COVID-19 and signs of cytokine release syndrome (COV-AID): a factorial, randomised, controlled trial. <i>Lancet Respir Med</i> 2021; 9:1427–38 |                                                                                                                                                                                                      |                                                                                                                                                                                                                                                                                                                                                                                                                                                                                                                                                                                                                                                                                                                                                                                                                                                                                                                                                                                                                                                                                                                                                                                                                                                                                                                                                                                                                                                                                                                         |                                                                                                                                                                                                                       |                |                                                                                                                                                                                                                                                                                                                                                                                                                                 |                                                    |
| <b>Design</b>                                                                                                                                                                                                                                  | <b>Study period and place</b>                                                                                                                                                                        | <b>Participants</b>                                                                                                                                                                                                                                                                                                                                                                                                                                                                                                                                                                                                                                                                                                                                                                                                                                                                                                                                                                                                                                                                                                                                                                                                                                                                                                                                                                                                                                                                                                     | <b>Intervention</b>                                                                                                                                                                                                   | <b>Control</b> | <b>Outcomes</b>                                                                                                                                                                                                                                                                                                                                                                                                                 | <b>Conclusion</b>                                  |
| open-label, Inpatient, (Preprint)                                                                                                                                                                                                              | 127 sites (4 sites for Moderate state (3 UK, 1 Australia) & 123 sites for Severe State (110 UK, 11 Netherlands, 3 Ireland, 2 Australia, 2 New-Zealand, 1 Canada, 1 Finland, 1 Italy, 1 Saudi-Arabia) | <p>Modulation Domain intervention: n=2,279<br/>N= 779<br/>A: n = 373<br/>C: n = 406</p> <p>Excluded:<br/>A: 13<br/>C: 12</p> <p><u>Follow-up:</u><br/>- 21 d for primary outcome and 90d for secondary outcomes</p> <p><b>Inclusion criteria:</b></p> <ul style="list-style-type: none"> <li>- &gt; 18 years</li> <li>- within 24 hours of receiving respiratory or cardiovascular organ support in an ICU</li> <li>- suspected or microbiologically confirmed COVID-19</li> </ul> <p><b>Exclusion criteria:</b></p> <ul style="list-style-type: none"> <li>- Patient has already received any dose of one or more of any form of anakinra during this hospitalization or is on long-term therapy with this agent prior to this hospital admission</li> <li>- Known condition or treatment resulting in ongoing immune suppression including neutropenia prior to this hospitalization</li> <li>- Patient has been randomized in a trial evaluating an immune modulation agent for proven or suspected COVID-19 infection, where the protocol of that trial requires ongoing administration of study drug</li> <li>- The treating clinician believes that participation in the domain would not be in the best interests of the patient</li> <li>- Known hypersensitivity to anakinra</li> <li>- Known hypersensitivity o proteins produced by E. coli</li> <li>- Known or suspected pregnancy</li> </ul> <p><b>Demographics:</b><br/><u>Age, mean (SD)</u><br/>Severe state;<br/>A: 59.8 (11.9)<br/>C: 61.1 (12.9)</p> | <p>100mg every 6 hours for 14 days or until for &gt; 24 h free from IMV or discharge from ICU.</p> <p>creatinine clearance &lt;30ml/min or receiving renal replacement therapy: dosing interval increased to 12 h</p> |                | <p>A: 145/365 (39.7)<br/>C: 150/406 (36.9)</p> <p><b>Secondary outcomes:</b><br/>90-day mortality, adjusted HR – mean (SD)<br/>A: 1.15 (0.16)<br/>C: 1<br/>Progression into intubation, ECMO or death, n (%)<br/>A: 122/228 (53.5)<br/>C: 147/276 (53.3)<br/>Time to ICU discharge, adjusted HR – mean (SD)<br/>A: 1.10 (0.12)<br/>C: 1<br/>Time to hospital discharge, adjusted HR – mean (SD)<br/>A: 1.05 (0.12)<br/>C: 1</p> | <p><u>Limitations:</u><br/>– open-label design</p> |

## Supplementary Information No 4 Characteristics of included studies

| <b>Declercq 2021</b>                                                                                                                                                                                                                           |                             |                                                                                                                                                                                                                                                                                                                                                                                                                                                                                                                                                                                                            |                                                                            |                                         |                                                                                                              |                                                                                                                                                                          |
|------------------------------------------------------------------------------------------------------------------------------------------------------------------------------------------------------------------------------------------------|-----------------------------|------------------------------------------------------------------------------------------------------------------------------------------------------------------------------------------------------------------------------------------------------------------------------------------------------------------------------------------------------------------------------------------------------------------------------------------------------------------------------------------------------------------------------------------------------------------------------------------------------------|----------------------------------------------------------------------------|-----------------------------------------|--------------------------------------------------------------------------------------------------------------|--------------------------------------------------------------------------------------------------------------------------------------------------------------------------|
| Declercq J, van Damme KFA, De Leeuw E, et al: Effect of anti-interleukin drugs in patients with COVID-19 and signs of cytokine release syndrome (COV-AID): a factorial, randomised, controlled trial. <i>Lancet Respir Med</i> 2021; 9:1427–38 |                             |                                                                                                                                                                                                                                                                                                                                                                                                                                                                                                                                                                                                            |                                                                            |                                         |                                                                                                              |                                                                                                                                                                          |
| Design                                                                                                                                                                                                                                         | Study period and place      | Participants                                                                                                                                                                                                                                                                                                                                                                                                                                                                                                                                                                                               | Intervention                                                               | Control                                 | Outcomes                                                                                                     | Conclusion                                                                                                                                                               |
|                                                                                                                                                                                                                                                |                             | Moderate State:<br>A: 36.0 (17.0)<br>C: 67.0 (13.7)<br><br>Male, n (%)<br>Severe state:<br>A: 269 (72.1)<br>C: 285 (70.2)<br>Moderate State:<br>A: 1 (50.0)<br>C: 1 (33.3)<br><br><b>Severity of condition according to respiratory support (n/N (%)):</b><br>None / supplemental oxygen only<br>A: 1/373 (0.3)<br>C: 2/406 (0.5)<br>High-flow nasal cannula<br>A: 101/373 (27.1)<br>C: 110/406 (27.1)<br>Non-invasive ventilation only<br>A: 133/373 (35.7)<br>C: 171/406 (42.1)<br>Invasive mechanical ventilation<br>A: 138/373 (37.0)<br>C: 122/406 (30.0)<br>ECMO<br>A: 0/373 (0.0)<br>C: 1/406 (0.2) |                                                                            |                                         |                                                                                                              |                                                                                                                                                                          |
| <sup>1</sup> The primary outcome was an ordinal scale that is a composite of in-hospital mortality and duration of respiratory and cardiovascular organ support (Days free from organ support in survivors, median (IQR))                      |                             |                                                                                                                                                                                                                                                                                                                                                                                                                                                                                                                                                                                                            |                                                                            |                                         |                                                                                                              |                                                                                                                                                                          |
| <b>Kharazmi 2021</b>                                                                                                                                                                                                                           |                             |                                                                                                                                                                                                                                                                                                                                                                                                                                                                                                                                                                                                            |                                                                            |                                         |                                                                                                              |                                                                                                                                                                          |
| Kharazmi AB, Moradi O, Haghighi M, et al: A randomized controlled clinical trial on efficacy and safety of anakinra in patients with severe COVID-19. <i>Immun Inflamm Dis</i> 2022; 10:201–08                                                 |                             |                                                                                                                                                                                                                                                                                                                                                                                                                                                                                                                                                                                                            |                                                                            |                                         |                                                                                                              |                                                                                                                                                                          |
| Design                                                                                                                                                                                                                                         | Study period and place      | Participants                                                                                                                                                                                                                                                                                                                                                                                                                                                                                                                                                                                               | Intervention                                                               | Control                                 | Outcomes                                                                                                     | Conclusion                                                                                                                                                               |
| Randomized controlled trial, open-label, Inpatient,                                                                                                                                                                                            | Iran, May 2020 to July 2020 | <b>Patients:</b><br>Screening: n = 72<br>Patients: n = 30<br>A: n = 15<br>C: n = 15<br>Excluded: n = 42                                                                                                                                                                                                                                                                                                                                                                                                                                                                                                    | <b>Anakinra</b><br>1x/day 100mg IV until discharge or a maximum of 14 days | <b>Standard of Care</b> (not specified) | <b>Primary outcome:</b><br><u>Need for invasive mechanical ventilation</u><br><br><b>Secondary outcomes:</b> | “Anakinra is effective in improving the respiratory condition and significantly reduces the need for invasive mechanical ventilation in patients with severe COVID-19. “ |

## Supplementary Information No 4 Characteristics of included studies

| Declercq 2021                                                                                                                                                                                                                                  |                        |                                                                                                                                                                                                                                                                                                                                                                                                                                                                                                                                                                                                                                                                                                                                                                                                                                                                                                                                                                                                                                                                                                                                                                                                                                                                                                                                                                                                                                                    |              |         |                                                                                                                                                                                                                                                                                                                                                                                                                                                                                                                                                                                                                                                                                                                                                                         |                                                                                                                                                                                                                                                                                                              |
|------------------------------------------------------------------------------------------------------------------------------------------------------------------------------------------------------------------------------------------------|------------------------|----------------------------------------------------------------------------------------------------------------------------------------------------------------------------------------------------------------------------------------------------------------------------------------------------------------------------------------------------------------------------------------------------------------------------------------------------------------------------------------------------------------------------------------------------------------------------------------------------------------------------------------------------------------------------------------------------------------------------------------------------------------------------------------------------------------------------------------------------------------------------------------------------------------------------------------------------------------------------------------------------------------------------------------------------------------------------------------------------------------------------------------------------------------------------------------------------------------------------------------------------------------------------------------------------------------------------------------------------------------------------------------------------------------------------------------------------|--------------|---------|-------------------------------------------------------------------------------------------------------------------------------------------------------------------------------------------------------------------------------------------------------------------------------------------------------------------------------------------------------------------------------------------------------------------------------------------------------------------------------------------------------------------------------------------------------------------------------------------------------------------------------------------------------------------------------------------------------------------------------------------------------------------------|--------------------------------------------------------------------------------------------------------------------------------------------------------------------------------------------------------------------------------------------------------------------------------------------------------------|
| Declercq J, van Damme KFA, De Leeuw E, et al: Effect of anti-interleukin drugs in patients with COVID-19 and signs of cytokine release syndrome (COV-AID): a factorial, randomised, controlled trial. <i>Lancet Respir Med</i> 2021; 9:1427–38 |                        |                                                                                                                                                                                                                                                                                                                                                                                                                                                                                                                                                                                                                                                                                                                                                                                                                                                                                                                                                                                                                                                                                                                                                                                                                                                                                                                                                                                                                                                    |              |         |                                                                                                                                                                                                                                                                                                                                                                                                                                                                                                                                                                                                                                                                                                                                                                         |                                                                                                                                                                                                                                                                                                              |
| Design                                                                                                                                                                                                                                         | Study period and place | Participants                                                                                                                                                                                                                                                                                                                                                                                                                                                                                                                                                                                                                                                                                                                                                                                                                                                                                                                                                                                                                                                                                                                                                                                                                                                                                                                                                                                                                                       | Intervention | Control | Outcomes                                                                                                                                                                                                                                                                                                                                                                                                                                                                                                                                                                                                                                                                                                                                                                | Conclusion                                                                                                                                                                                                                                                                                                   |
|                                                                                                                                                                                                                                                |                        | <p><u>Follow-up:</u><br/>for the primary outcome: until endotracheal intubation due to hypoxemia<br/>for the secondary outcomes: until hospital discharge</p> <p><b>Inclusion criteria:</b></p> <ul style="list-style-type: none"> <li>– confirmed diagnosis of COVID-19 based on reverse transcriptase-polymerase chain reaction</li> <li>– admitted to ICU</li> <li>– &gt; 18 years old</li> <li>– elevated C-reactive protein (CRP) levels</li> <li>– oxygen saturation <math>\leq</math> 93% measured using a peripheral capillary pulse oximeter</li> <li>– fever (core temperature of 37.8°C or more), or cough or shortness of breath, and PaO<sub>2</sub>/FiO<sub>2</sub> less than 300</li> </ul> <p><b>Exclusion criteria:</b></p> <ul style="list-style-type: none"> <li>– Patients who had positive results for tuberculosis (i.e., positive Mendel–Mantoux or QuantiFERON test),</li> <li>– viral hepatitis B or C</li> <li>– hemoglobin &lt; 7.5 g/dl</li> <li>– platelet count &lt; 100,000 cells/<math>\mu</math>l</li> <li>– serum glutamic–oxaloacetic transaminase or serum glutamic–pyruvic transaminase &gt; five upper limits of normal</li> <li>– untreated active infection</li> <li>– previous administration of anakinumab or anakinra</li> </ul> <p><b>Demographics:</b></p> <p><u>Age, (SD)</u><br/>A: 49.25 <math>\pm</math> 19.12<br/>C: 59.00 <math>\pm</math> 1.79</p> <p><u>Male, (%)</u><br/>A: 8%<br/>C: 7%</p> |              |         | <p>Hospital length of stay, Median (IQR)<br/>A: 10 (5)<br/>C: 28 (15)</p> <p>ICU length of stay, Median (IQR)<br/>A: 5 (3)<br/>C: 16 (19)</p> <p><u>Seven categories ordinal scale, n (%)</u><br/>Death<br/>A: 5 (33.3)<br/>C: 7 (46.7)<br/>p = .456<br/>Hospitalized, on invasive mechanical ventilation or extracorporeal membrane oxygenation.<br/>A: 0 (0)<br/>C: 2 (13.3)<br/>P = .483<br/>Hospitalized, on non-invasive ventilation or high flow oxygen<br/>A: 0 (0)<br/>C: 1 (6.7)<br/>P = 1.000<br/>Hospitalized, requiring low flow supplemental oxygen<br/>A: 0 (0)<br/>C: 0 (0)<br/>P = 1.000<br/>Hospitalized, not requiring supplemental oxygen—requiring ongoing medical care (COVID-19 related or otherwise)<br/>A: 0 (0)<br/>C: 0 (0)<br/>P = 1.000</p> | <p>“The reduction was observed in hospitalization duration, which makes the medication an effective immunomodulatory agent to combat cytokine storm.”</p> <p><b>Comments:</b><br/><u>Limitations:</u></p> <ul style="list-style-type: none"> <li>– Open label design</li> <li>– Small sample size</li> </ul> |

## Supplementary Information No 4 Characteristics of included studies

| <b>Declercq 2021</b>                                                                                                                                                                                                                             |                                                                                           |                                                                                                                                                                                                                                                                                                                                                                                                                                                                                                                                                                                                                                                                                                                                                        |                                                                                           |                                                          |                                                                                                                                                                                                                                                                                                                                                                                                                                           |                                                                                                                                                                                                                                                                                                                                                                                                                                                                                                                                                                                                                                                                                                                                                               |
|--------------------------------------------------------------------------------------------------------------------------------------------------------------------------------------------------------------------------------------------------|-------------------------------------------------------------------------------------------|--------------------------------------------------------------------------------------------------------------------------------------------------------------------------------------------------------------------------------------------------------------------------------------------------------------------------------------------------------------------------------------------------------------------------------------------------------------------------------------------------------------------------------------------------------------------------------------------------------------------------------------------------------------------------------------------------------------------------------------------------------|-------------------------------------------------------------------------------------------|----------------------------------------------------------|-------------------------------------------------------------------------------------------------------------------------------------------------------------------------------------------------------------------------------------------------------------------------------------------------------------------------------------------------------------------------------------------------------------------------------------------|---------------------------------------------------------------------------------------------------------------------------------------------------------------------------------------------------------------------------------------------------------------------------------------------------------------------------------------------------------------------------------------------------------------------------------------------------------------------------------------------------------------------------------------------------------------------------------------------------------------------------------------------------------------------------------------------------------------------------------------------------------------|
| Declercq J, van Damme KFA, De Leeuw E, et al: Effect of anti-interleukin drugs in patients with COVID-19 and signs of cytokine release syndrome (COV-AID): a factorial, randomised, controlled trial. <i>Lancet Respir Med</i> 2021; 9:1427–38   |                                                                                           |                                                                                                                                                                                                                                                                                                                                                                                                                                                                                                                                                                                                                                                                                                                                                        |                                                                                           |                                                          |                                                                                                                                                                                                                                                                                                                                                                                                                                           |                                                                                                                                                                                                                                                                                                                                                                                                                                                                                                                                                                                                                                                                                                                                                               |
| Design                                                                                                                                                                                                                                           | Study period and place                                                                    | Participants                                                                                                                                                                                                                                                                                                                                                                                                                                                                                                                                                                                                                                                                                                                                           | Intervention                                                                              | Control                                                  | Outcomes                                                                                                                                                                                                                                                                                                                                                                                                                                  | Conclusion                                                                                                                                                                                                                                                                                                                                                                                                                                                                                                                                                                                                                                                                                                                                                    |
|                                                                                                                                                                                                                                                  |                                                                                           | <b>Severity of condition according to respiratory support (n/N (%)):</b><br>IMV or ECMO:<br>A: 2/15 (13); C: 3/15 (20)<br>non-IMV or high flow oxygen:<br>A: 10/15 (67); C: 6/15 (40)<br>low flow supplemental oxygen only:<br>A: 3/15 (20); C: 6/15 (40)                                                                                                                                                                                                                                                                                                                                                                                                                                                                                              |                                                                                           |                                                          | Hospitalized, not requiring supplemental oxygen—no longer required ongoing medical care.<br>A: 0 (0)<br>C: 0 (0)<br>P = 1.000<br>Not hospitalized<br>A: 10 (66.7)<br>C: 5 (33.3)<br>P = .143<br><br>Survival for included patients on day 14                                                                                                                                                                                              |                                                                                                                                                                                                                                                                                                                                                                                                                                                                                                                                                                                                                                                                                                                                                               |
| <b>Kyriazopoulou 2021</b>                                                                                                                                                                                                                        |                                                                                           |                                                                                                                                                                                                                                                                                                                                                                                                                                                                                                                                                                                                                                                                                                                                                        |                                                                                           |                                                          |                                                                                                                                                                                                                                                                                                                                                                                                                                           |                                                                                                                                                                                                                                                                                                                                                                                                                                                                                                                                                                                                                                                                                                                                                               |
| Kyriazopoulou E, Poulakou G, Milionis H, et al: Early treatment of COVID-19 with anakinra guided by soluble urokinase plasminogen receptor plasma levels: a double-blind, randomized controlled phase 3 trial. <i>Nat Med</i> 2021; 27:1752–1760 |                                                                                           |                                                                                                                                                                                                                                                                                                                                                                                                                                                                                                                                                                                                                                                                                                                                                        |                                                                                           |                                                          |                                                                                                                                                                                                                                                                                                                                                                                                                                           |                                                                                                                                                                                                                                                                                                                                                                                                                                                                                                                                                                                                                                                                                                                                                               |
| Design                                                                                                                                                                                                                                           | Study period and place                                                                    | Participants                                                                                                                                                                                                                                                                                                                                                                                                                                                                                                                                                                                                                                                                                                                                           | Intervention                                                                              | Control                                                  | Outcomes                                                                                                                                                                                                                                                                                                                                                                                                                                  | Conclusion                                                                                                                                                                                                                                                                                                                                                                                                                                                                                                                                                                                                                                                                                                                                                    |
| Randomized controlled trial; double-blinded, placebo-controlled, Inpatient                                                                                                                                                                       | 23 December 2020 to 31 March 2021<br><br>37 study sites (29 in Greece and eight in Italy) | <b>Patients:</b><br>Screening: n=1,060<br>Patients: n=606<br>A: n=405<br>C: n=189<br>Excluded: n=454<br><br><b>Follow-up:</b><br>until hospital discharge<br><br><b>Inclusion criteria:</b> <ul style="list-style-type: none"> <li>– adult patients of either sex</li> <li>– for women, unwillingness to remain pregnant during the study period</li> <li>– confirmed infection by SARS-CoV-2 by molecular test</li> <li>– findings in chest X-ray or chest computed tomography compatible with lower respiratory tract infection</li> <li>– need for hospitalization</li> <li>– plasma suPAR <math>\geq 6 \text{ ng ml}^{-1}</math></li> </ul> <b>Exclusion criteria:</b> <ul style="list-style-type: none"> <li>– any stage IV malignancy</li> </ul> | <b>Anakinra</b><br>1x/day 100mg subcutaneously at a final volume of 0.67 ml for 7-10 days | <b>Placebo</b><br>1x/day 0.67 ml of 0.9% sodium chloride | <b>Primary outcome:</b><br><u>11-point WHO-CPS at day 28, n (%)</u><br><b>Fully recovered PCR–</b><br>A: 204 (50.4)<br>C: 50 (26.5)<br>Asymptomatic PCR+<br>A: 40 (9.9)<br>C: 6 (3.2)<br>Symptomatic independent<br>A: 93 (23.0)<br>C: 74 (39.2)<br>Symptomatic assistance needed<br>A: 25 (6.2)<br>C: 21 (11.1)<br>Hospitalized with no need for oxygen<br>A: 9 (2.2)<br>C: 3 (1.6)<br>Hospitalized with nasal/mask oxygen<br>A: 8 (2.0) | “In conclusion, the SAVE-MORE trial showed that early start of treatment with anakinra guided by suPAR levels in patients hospitalized with moderate and severe COVID-19 significantly reduced the risk of worse clinical outcome at day 28.”<br><br><b>Comments:</b><br><b>Limitations:</b> <ul style="list-style-type: none"> <li>– the lack of enrollment of patients with critical COVID-19</li> <li>– the difficulty for application of suPAR in all hospital settings</li> <li>– inclusion of patients with SuPAR <math>\geq 6 \text{ ng ml}^{-1}</math></li> </ul> <b>Power-analysis:</b><br>“To replicate this primary effect size in the SAVE-MORE trial, and with a 90% power at the 5% significance level, a sample size of 200 was needed for the |

## Supplementary Information No 4 Characteristics of included studies

| <b>Declercq 2021</b>                                                                                                                                                                                                                           |                               |                                                                                                                                                                                                                                                                                                                                                                                                                                                                                                                                                                                                                                                                                                                                                                                                                                                                                                                                                                                                                                                                                                                                                                                                                                                                                                                                                                                               |                     |                |                                                                                                                                                                                                                                                                                                                                 |                                                                |
|------------------------------------------------------------------------------------------------------------------------------------------------------------------------------------------------------------------------------------------------|-------------------------------|-----------------------------------------------------------------------------------------------------------------------------------------------------------------------------------------------------------------------------------------------------------------------------------------------------------------------------------------------------------------------------------------------------------------------------------------------------------------------------------------------------------------------------------------------------------------------------------------------------------------------------------------------------------------------------------------------------------------------------------------------------------------------------------------------------------------------------------------------------------------------------------------------------------------------------------------------------------------------------------------------------------------------------------------------------------------------------------------------------------------------------------------------------------------------------------------------------------------------------------------------------------------------------------------------------------------------------------------------------------------------------------------------|---------------------|----------------|---------------------------------------------------------------------------------------------------------------------------------------------------------------------------------------------------------------------------------------------------------------------------------------------------------------------------------|----------------------------------------------------------------|
| Declercq J, van Damme KFA, De Leeuw E, et al: Effect of anti-interleukin drugs in patients with COVID-19 and signs of cytokine release syndrome (COV-AID): a factorial, randomised, controlled trial. <i>Lancet Respir Med</i> 2021; 9:1427–38 |                               |                                                                                                                                                                                                                                                                                                                                                                                                                                                                                                                                                                                                                                                                                                                                                                                                                                                                                                                                                                                                                                                                                                                                                                                                                                                                                                                                                                                               |                     |                |                                                                                                                                                                                                                                                                                                                                 |                                                                |
| <b>Design</b>                                                                                                                                                                                                                                  | <b>Study period and place</b> | <b>Participants</b>                                                                                                                                                                                                                                                                                                                                                                                                                                                                                                                                                                                                                                                                                                                                                                                                                                                                                                                                                                                                                                                                                                                                                                                                                                                                                                                                                                           | <b>Intervention</b> | <b>Control</b> | <b>Outcomes</b>                                                                                                                                                                                                                                                                                                                 | <b>Conclusion</b>                                              |
|                                                                                                                                                                                                                                                |                               | <ul style="list-style-type: none"> <li>– any do-not-resuscitate order</li> <li>– ratio or partial oxygen pressure to fraction of inspired oxygen less than 150 mmHg</li> <li>– need of NIV (CPAP or BPAP) or MV</li> <li>– any primary immunodeficiency</li> <li>– fewer than 1,500 neutrophils per mm<sup>3</sup></li> <li>– oral or intravenous intake of corticosteroids at a daily dose greater than or equal to 0.4 mg kg<sup>-1</sup> of prednisone for a period longer than the last 15 d</li> <li>– any anti-cytokine biological treatment, including JAK inhibitors, during the last 1 month</li> <li>– severe hepatic failure</li> <li>– end-stage renal failure necessitating hemofiltration or peritoneal hemodialysis</li> <li>– pregnancy or lactation.</li> </ul> <p><b>Demographics (I/B1/B2):</b><br/> <u>Age, mean (SD)</u><br/>                     A: 62 (11.4)<br/>                     C: 61.5 (11.3)<br/> <u>Male, n (%)</u><br/>                     A: 236 (58.3)<br/>                     C: 108 (57.1)</p> <p><b>Severity of condition according to respiratory support (n/N (%)):</b><br/>                     no supplemental oxygen:<br/>                     A:39/405 (10); C:11/189 (6)<br/>                     low or high flow supplemental oxygen:<br/>                     A: 366/405 (90); C: 178/189 (94)<br/>                     suPAR ≥ 6 ng/ml</p> |                     |                | C: 10 (5.3)<br>Need for HFO or NIV<br>A: 1 (0.2)<br>C: 1 (0.5)<br>MV with P/F > 150 mmHg<br>A: 1 (0.2)<br>C: 1 (0.5)<br>MV with P/F < 150 mmHg or vasopressors<br>A: 5 (1.2)<br>C: 4 (2.1)<br>MV with P/F < 150 mmHg and vasopressors or hemodialysis or ECMO<br>A: 6 (1.5)<br>C: 6 (3.2)<br>Dead<br>A: 13 (3.2)<br>C: 13 (6.9) | placebo treatment arm and 400 for the anakinra treatment arm.” |
| <b>Tharaux 2021</b>                                                                                                                                                                                                                            |                               |                                                                                                                                                                                                                                                                                                                                                                                                                                                                                                                                                                                                                                                                                                                                                                                                                                                                                                                                                                                                                                                                                                                                                                                                                                                                                                                                                                                               |                     |                |                                                                                                                                                                                                                                                                                                                                 |                                                                |

## Supplementary Information No 4 Characteristics of included studies

| <b>Declercq 2021</b>                                                                                                                                                                                                                           |                                                             |                                                                                                                                                                                                                                                                                                                                                                                                                                                                                                                                                                                                                                                                                                                                                                                                                                                                                                                                                                                                                                                                                                                                                                                                                                     |                                                                                                                                                                                                                                                                                                                                                                   |                                                                                                                                |                                                                                                                                                                                                                                                                                                                                                                                                                                                                                                                                                                                                                                                                                                                                                                                                                              |                                                                                                                                                                                                                                                                                                                                                                                                                                                                                                                                                                                                                                                                                                                                                                                                                               |
|------------------------------------------------------------------------------------------------------------------------------------------------------------------------------------------------------------------------------------------------|-------------------------------------------------------------|-------------------------------------------------------------------------------------------------------------------------------------------------------------------------------------------------------------------------------------------------------------------------------------------------------------------------------------------------------------------------------------------------------------------------------------------------------------------------------------------------------------------------------------------------------------------------------------------------------------------------------------------------------------------------------------------------------------------------------------------------------------------------------------------------------------------------------------------------------------------------------------------------------------------------------------------------------------------------------------------------------------------------------------------------------------------------------------------------------------------------------------------------------------------------------------------------------------------------------------|-------------------------------------------------------------------------------------------------------------------------------------------------------------------------------------------------------------------------------------------------------------------------------------------------------------------------------------------------------------------|--------------------------------------------------------------------------------------------------------------------------------|------------------------------------------------------------------------------------------------------------------------------------------------------------------------------------------------------------------------------------------------------------------------------------------------------------------------------------------------------------------------------------------------------------------------------------------------------------------------------------------------------------------------------------------------------------------------------------------------------------------------------------------------------------------------------------------------------------------------------------------------------------------------------------------------------------------------------|-------------------------------------------------------------------------------------------------------------------------------------------------------------------------------------------------------------------------------------------------------------------------------------------------------------------------------------------------------------------------------------------------------------------------------------------------------------------------------------------------------------------------------------------------------------------------------------------------------------------------------------------------------------------------------------------------------------------------------------------------------------------------------------------------------------------------------|
| Declercq J, van Damme KFA, De Leeuw E, et al: Effect of anti-interleukin drugs in patients with COVID-19 and signs of cytokine release syndrome (COV-AID): a factorial, randomised, controlled trial. <i>Lancet Respir Med</i> 2021; 9:1427–38 |                                                             |                                                                                                                                                                                                                                                                                                                                                                                                                                                                                                                                                                                                                                                                                                                                                                                                                                                                                                                                                                                                                                                                                                                                                                                                                                     |                                                                                                                                                                                                                                                                                                                                                                   |                                                                                                                                |                                                                                                                                                                                                                                                                                                                                                                                                                                                                                                                                                                                                                                                                                                                                                                                                                              |                                                                                                                                                                                                                                                                                                                                                                                                                                                                                                                                                                                                                                                                                                                                                                                                                               |
| <b>Design</b>                                                                                                                                                                                                                                  | <b>Study period and place</b>                               | <b>Participants</b>                                                                                                                                                                                                                                                                                                                                                                                                                                                                                                                                                                                                                                                                                                                                                                                                                                                                                                                                                                                                                                                                                                                                                                                                                 | <b>Intervention</b>                                                                                                                                                                                                                                                                                                                                               | <b>Control</b>                                                                                                                 | <b>Outcomes</b>                                                                                                                                                                                                                                                                                                                                                                                                                                                                                                                                                                                                                                                                                                                                                                                                              | <b>Conclusion</b>                                                                                                                                                                                                                                                                                                                                                                                                                                                                                                                                                                                                                                                                                                                                                                                                             |
| The CORIMUNO-19 Collaborative Group: Effect of anakinra versus usual care in adults in hospital with COVID-19 and mild-to-moderate pneumonia (CORIMUNO-ANA-1): a randomised controlled trial. <i>Lancet Respir Med</i> 2021; 9:295-304         |                                                             |                                                                                                                                                                                                                                                                                                                                                                                                                                                                                                                                                                                                                                                                                                                                                                                                                                                                                                                                                                                                                                                                                                                                                                                                                                     |                                                                                                                                                                                                                                                                                                                                                                   |                                                                                                                                |                                                                                                                                                                                                                                                                                                                                                                                                                                                                                                                                                                                                                                                                                                                                                                                                                              |                                                                                                                                                                                                                                                                                                                                                                                                                                                                                                                                                                                                                                                                                                                                                                                                                               |
| <b>Design</b>                                                                                                                                                                                                                                  | <b>Study period and place</b>                               | <b>Participants</b>                                                                                                                                                                                                                                                                                                                                                                                                                                                                                                                                                                                                                                                                                                                                                                                                                                                                                                                                                                                                                                                                                                                                                                                                                 | <b>Intervention</b>                                                                                                                                                                                                                                                                                                                                               | <b>Control</b>                                                                                                                 | <b>Outcomes</b>                                                                                                                                                                                                                                                                                                                                                                                                                                                                                                                                                                                                                                                                                                                                                                                                              | <b>Conclusion</b>                                                                                                                                                                                                                                                                                                                                                                                                                                                                                                                                                                                                                                                                                                                                                                                                             |
| Randomized controlled trial, open-label, Inpatient                                                                                                                                                                                             | 08.04 – 26.04.2020<br><br>16 University hospitals in France | <b>Patients:</b><br>Screening: n = 153<br>Patients: n = 116<br>A: n = 59<br>C: n = 57<br>Excluded: n=37<br><br><u>Follow-up:</u><br>14d for primary outcome and 28d or 90d for secondary outcomes<br><br><b>Inclusion criteria:</b><br>- adult patients<br>-confirmed SARS-CoV-2 infection (positive on real-time RT-PCR or chest CT scan typical of COVID-19 pneumonia, or both) with mild-to-moderate, severe, or critical pneumonia (ie, receiving oxygen at a flow of >3 L/min via mask or nasal cannula and a score of ≥5 points on the WHO Clinical Progression Scale [WHO-CPS] 10-point ordinal Scale<br>-C-reactive protein serum concentration of more than 25 mg/L not requiring admission to the hospital intensive care unit at the time of admission<br>-mild-to-moderate COVID-19 pneumonia with a WHO-CPS score of 5 points, receiving at least 3 L/min of oxygen but without ventilation assistance (eg, high-flow oxygen, non-invasive ventilation, or mechanical ventilation).<br><br><b>Exclusion criteria:</b><br>- known hypersensitivity to Anakinra or any of its excipients<br>- pregnancy<br>- current documented bacterial infection<br>- an absolute neutrophil count of $1.0 \times 10^9$ per L or less | <b>Anakinra</b><br>2 x 200 mg (i.v.) daily on days 1–3, followed by 2 x 100 mg (i.v.) daily on day 4 and 100 mg (i.v.) /daily on day 5<br><br>In the absence of improvement (reduction in oxygen requirement by >50%) after 3 days, decision by practitioner:<br><br>2x 200 mg(i.v.) daily d4-6, then<br><br>2x 100 mg (i.v.) d7, then<br><br>1x 100 mg (i.v.) d8 | <b>Standard of Care:</b><br>Antibiotics, antiviral meds, corticosteroids, vasopressors, anticoagulants (practitioner's choice) | <b>Co-primary outcomes:</b><br><u>The proportion of patients who had died or needed non-invasive or mechanical ventilation by day 4 (ie, a score of &gt;5 on the WHO-CPS)</u><br><br>A: 21/59 (36%)<br>C: 21/55 (38%)<br><br><u>Survival without need for mechanical or non-invasive ventilation (including high-flow oxygen) at day 14.</u><br>median posterior HR: 0.97 (90% CrI 0.62 to 1.52)<br><br><u>Non-invasive ventilation, mechanical ventilation or death up to day 14</u><br>A: 28 (47%; 95% CI 33 to 59)<br>C: 28 (51%; 95% CI 36 to 62)<br><br><u>Mortality, at day 90</u><br>A: 16 (27%)<br>C: 15 (27%)<br><br><u>Serious adverse events, n (%), p</u><br>Patients with at least one serious adverse event<br>27 (46%) / 21 (38%), 0.45<br>Patients with multiple serious adverse events<br>8 (14%) / 5 (9%), | “Anakinra did not improve outcomes in patients with mild-to-moderate COVID-19 pneumonia. Further studies are needed to assess the efficacy of anakinra in other selected groups of patients with more severe COVID-19.”<br><br><b>Comments:</b><br><u>Limitations</u><br>– No blinding<br>– usual care could differ among centres and over time<br>– small sample size<br>– wide CrIs and CIs<br>– no provision of an accurate measure of the ratio of partial pressure of oxygen to fractional concentration of oxygen in inspired air, because arterial blood gas measurements were not done<br>– narrow segment of the COVID-19 patient population targeted (patients with a WHO-CPS score of exactly 5 points and requiring at least 3 L/min of oxygen without any ventilatory support regardless of inflammatory status) |



## Supplementary Information No 4 Characteristics of included studies

| <b>Declercq 2021</b>                                                                                                                                                                                                                           |                        |                                                                                                                                                                                                                                                                                                                                                                                                                                                                                                                                                                                                                                                                                                                                                                            |              |         |                                                                                                                                                                                                                                                                                                                                                                                                                                                                                                                                                                                                                                                                                                                                                                                                                                                                                                                                                                                                                                                                                                                                                                                     |            |
|------------------------------------------------------------------------------------------------------------------------------------------------------------------------------------------------------------------------------------------------|------------------------|----------------------------------------------------------------------------------------------------------------------------------------------------------------------------------------------------------------------------------------------------------------------------------------------------------------------------------------------------------------------------------------------------------------------------------------------------------------------------------------------------------------------------------------------------------------------------------------------------------------------------------------------------------------------------------------------------------------------------------------------------------------------------|--------------|---------|-------------------------------------------------------------------------------------------------------------------------------------------------------------------------------------------------------------------------------------------------------------------------------------------------------------------------------------------------------------------------------------------------------------------------------------------------------------------------------------------------------------------------------------------------------------------------------------------------------------------------------------------------------------------------------------------------------------------------------------------------------------------------------------------------------------------------------------------------------------------------------------------------------------------------------------------------------------------------------------------------------------------------------------------------------------------------------------------------------------------------------------------------------------------------------------|------------|
| Declercq J, van Damme KFA, De Leeuw E, et al: Effect of anti-interleukin drugs in patients with COVID-19 and signs of cytokine release syndrome (COV-AID): a factorial, randomised, controlled trial. <i>Lancet Respir Med</i> 2021; 9:1427–38 |                        |                                                                                                                                                                                                                                                                                                                                                                                                                                                                                                                                                                                                                                                                                                                                                                            |              |         |                                                                                                                                                                                                                                                                                                                                                                                                                                                                                                                                                                                                                                                                                                                                                                                                                                                                                                                                                                                                                                                                                                                                                                                     |            |
| Design                                                                                                                                                                                                                                         | Study period and place | Participants                                                                                                                                                                                                                                                                                                                                                                                                                                                                                                                                                                                                                                                                                                                                                               | Intervention | Control | Outcomes                                                                                                                                                                                                                                                                                                                                                                                                                                                                                                                                                                                                                                                                                                                                                                                                                                                                                                                                                                                                                                                                                                                                                                            | Conclusion |
|                                                                                                                                                                                                                                                |                        | <p>- a platelet concentration of less than 50 G/L</p> <p>- serum aspartate aminotransferase or serum alanine aminotransferase of more than fivetimes the upper limit of normal</p> <p>- severe renal insufficiency defined by an estimated glomerular filtration rate of less than 30 mL/min.</p> <p><b>Demographics:</b><br/> <u>Age, median (IQR):</u><br/>                     66 (59 - 76)<br/>                     A: 67 (55.5 –74.3)<br/>                     C: 64,9 (59.5 –78.3)</p> <p><u>Male, n</u><br/>                     80 (70%)</p> <p><b>Severity of condition according to respiratory support (n/N (%)):</b><br/>                     Low flow supplemental oxygen<br/>                     A: 59/59 (100)<br/>                     C: 55/55 (100)</p> |              |         | <p><b>Secondary outcomes:</b><br/>                     - clinical status assessed with the WHO-CPS at days 4, 7, and 14;</p> <p><u>Overall survival at days 14, 28, and 90</u><br/>                     Mortality at day 14<br/>                     A: 9 (15%)<br/>                     C: 13 (24%)<br/>                     Adjusted HR: 0.56 (95% CI 0.23 to 1.39)</p> <p>Mortality at day 28<br/>                     A: 13 (22%)<br/>                     C: 13 (24%)<br/>                     Adjusted HR: 0.77 (95% CI 0.33 to 1.77)</p> <p>Mortality at day 90<br/>                     A: 16 (27%)<br/>                     C: 15 (27%)<br/>                     Adjusted HR: 0.97 (95% CI 0.46 to 2.04)</p> <p><u>time to discharge at day 28</u><br/>                     A: 34 (58%)<br/>                     C: 34 (62%)<br/>                     Adjusted HR: 0.91 (95% CI 0.56 to 1.48)</p> <p><u>Time to oxygen supply independency at day 28, n (%), adj. HR (95% CI)</u><br/>                     37 (63%) / 38 (69%), 1.01 (95% CI 0.64 to 1.61)</p> <p><u>time to negative viral excretion</u><br/>                     not assessed due to paucity of data</p> |            |

## Supplementary Information No 4 Characteristics of included studies

| <b>Declercq 2021</b>                                                                                                                                                                                                                           |                        |              |              |         |                                                                                                                                                                                                                                                                                                                                                                                                                                                                                                       |            |
|------------------------------------------------------------------------------------------------------------------------------------------------------------------------------------------------------------------------------------------------|------------------------|--------------|--------------|---------|-------------------------------------------------------------------------------------------------------------------------------------------------------------------------------------------------------------------------------------------------------------------------------------------------------------------------------------------------------------------------------------------------------------------------------------------------------------------------------------------------------|------------|
| Declercq J, van Damme KFA, De Leeuw E, et al: Effect of anti-interleukin drugs in patients with COVID-19 and signs of cytokine release syndrome (COV-AID): a factorial, randomised, controlled trial. <i>Lancet Respir Med</i> 2021; 9:1427–38 |                        |              |              |         |                                                                                                                                                                                                                                                                                                                                                                                                                                                                                                       |            |
| Design                                                                                                                                                                                                                                         | Study period and place | Participants | Intervention | Control | Outcomes                                                                                                                                                                                                                                                                                                                                                                                                                                                                                              | Conclusion |
|                                                                                                                                                                                                                                                |                        |              |              |         | <p><u>biological factors (eg, C-reactive protein concentration)</u></p> <p>Adverse events, n (%), p<br/>           Patients with at least one adverse event<br/>           29 (49%) / 23 (42%), 0.46<br/>           Patients with multiple adverse events<br/>           19 (32%) / 14 (25%)</p> <p><b>Subgroup analysis:</b><br/>           prespecified subgroup analysis according to antiviral drug use at baseline: too few patients were on antivirals at baseline to enable this analysis.</p> |            |
