# Supplementary material
Source: PubMed Central journal article supplement (PMC9960437)
Supplement: 40001_2023_1072_MOESM5_ESM.pdf [file 40001_2023_1072_MOESM5_ESM.pdf]

**Supplementary Information No 5** Risk of bias assessment

**Table 1** Risk of bias analysis for 28-day mortality

| Outcome          | Study              | Risk of Bias Domain                          |                                        |                      |                            |                                   |               |
|------------------|--------------------|----------------------------------------------|----------------------------------------|----------------------|----------------------------|-----------------------------------|---------------|
|                  |                    | Randomisation process                        | Deviations from intended interventions | Missing outcome data | Measurement of the outcome | Selection of the reported results | Overall       |
| 28-day mortality | Declercq 2021      | Low                                          | Low                                    | Low                  | Low                        | Low                               | Low           |
|                  | Derde 2021         | Low                                          | Low                                    | Low                  | Low                        | Low                               | Low           |
|                  | Kyriazopoulou 2021 | Some concerns<br>due to baseline differences | Low                                    | Low                  | Low                        | Low                               | Some concerns |
|                  | Tharaux 2021       | Low                                          | Low                                    | Low                  | Low                        | Low                               | Low           |

**Table 2** Risk of bias analysis for 60-day mortality

| Outcome          | Study         | Risk of Bias Domain   |                                        |                      |                            |                                   |         |
|------------------|---------------|-----------------------|----------------------------------------|----------------------|----------------------------|-----------------------------------|---------|
|                  |               | Randomisation process | Deviations from intended interventions | Missing outcome data | Measurement of the outcome | Selection of the reported results | Overall |
| 60-day mortality | Declercq 2021 | Low                   | Low                                    | Low                  | Low                        | Low                               | Low     |

**Table 3** Risk of bias analysis for mortality time-to-event at day 28

| Outcome                         | Study              | Risk of Bias Domain                          |                                        |                      |                            |                                   |               |
|---------------------------------|--------------------|----------------------------------------------|----------------------------------------|----------------------|----------------------------|-----------------------------------|---------------|
|                                 |                    | Randomisation process                        | Deviations from intended interventions | Missing outcome data | Measurement of the outcome | Selection of the reported results | Overall       |
| Mortality time-to-event, 28 day | Tharaux 2021       | Low                                          | Low                                    | Low                  | Low                        | Low                               | Low           |
|                                 | Kyriazopoulou 2021 | Some concerns<br>due to baseline differences | Low                                    | Low                  | Low                        | Low                               | Some concerns |

**Table 4** Risk of bias analysis for mortality time-to-event at day 90

| Outcome                         | Study        | Risk of Bias          |                                        |                      |                            |                                   |         |
|---------------------------------|--------------|-----------------------|----------------------------------------|----------------------|----------------------------|-----------------------------------|---------|
|                                 |              | Randomisation process | Deviations from intended interventions | Missing outcome data | Measurement of the outcome | Selection of the reported results | Overall |
| Mortality time-to-event, 90 day | Tharoux 2021 | Low                   | Low                                    | Low                  | Low                        | Low                               | Low     |
|                                 | Derde 2021   | Low                   | Low                                    | Low                  | Low                        | Low                               | Low     |

**Table 5** Risk of bias analysis for mortality at hospital discharge

| Outcome                         | Study         | Risk of Bias          |                                        |                      |                            |                                   |         |
|---------------------------------|---------------|-----------------------|----------------------------------------|----------------------|----------------------------|-----------------------------------|---------|
|                                 |               | Randomisation process | Deviations from intended interventions | Missing outcome data | Measurement of the outcome | Selection of the reported results | Overall |
| Mortality at hospital discharge | Derde 2021    | Low                   | Low                                    | Low                  | Low                        | Low                               | Low     |
|                                 | Declercq 2021 | Low                   | Low                                    | Low                  | Low                        | Low                               | Low     |

**Table 6** Risk of bias analysis for clinical worsening: new need for invasive mechanical ventilation or death at day 28

| Outcome                                                          | Study              | Risk of Bias Domain                          |                                        |                      |                            |                                   |               |
|------------------------------------------------------------------|--------------------|----------------------------------------------|----------------------------------------|----------------------|----------------------------|-----------------------------------|---------------|
|                                                                  |                    | Randomisation process                        | Deviations from intended interventions | Missing outcome data | Measurement of the outcome | Selection of the reported results | Overall       |
| Clinical worsening: new need for invasive mechanical ventilation | Declercq 2021      | Low                                          | Low                                    | Low                  | Low                        | Low                               | Low           |
|                                                                  | Kyriazopoulou 2021 | Some concerns<br>due to baseline differences | Low                                    | Low                  | Low                        | Low                               | Some concerns |

**Table 7** Risk of bias analysis for clinical improvement: patients discharged alive

| Outcome                                         | Study              | Risk of Bias Domain                          |                                        |                      |                            |                                   |               |
|-------------------------------------------------|--------------------|----------------------------------------------|----------------------------------------|----------------------|----------------------------|-----------------------------------|---------------|
|                                                 |                    | Randomisation process                        | Deviations from intended interventions | Missing outcome data | Measurement of the outcome | Selection of the reported results | Overall       |
| Clinical improvement: patients discharged alive | Declercq 2021      | Low                                          | Low                                    | Low                  | Low                        | Low                               | Low           |
|                                                 | Kyriazopoulou 2021 | Some concerns<br>due to baseline differences | Low                                    | Low                  | Low                        | Low                               | Some concerns |
|                                                 | Tharaux 2021       | Low                                          | Low                                    | Low                  | Low                        | Low                               | Low           |

**Table 8** Risk of bias analysis for serious adverse events

| Bias                   |                    |                                           |                                        |                      |                            |                                   |               |
|------------------------|--------------------|-------------------------------------------|----------------------------------------|----------------------|----------------------------|-----------------------------------|---------------|
| Outcome                | Study              | Randomisation process                     | Deviations from intended interventions | Missing outcome data | Measurement of the outcome | Selection of the reported results | Overall       |
| Serious adverse events | Declercq 2021      | Low                                       | Low                                    | Low                  | Low                        | Low                               | Low           |
|                        | Kyriazopoulou 2021 | Some concerns due to baseline differences | Low                                    | Low                  | Low                        | Low                               | Some concerns |
|                        | Tharoux 2021       | Low                                       | Low                                    | Low                  | Low                        | Low                               | Low           |



**Table 9** Risk of bias analysis for any adverse events

| Outcome             | Study         | Risk of Bias Domain   |                                        |                      |                                       |                                   |               |
|---------------------|---------------|-----------------------|----------------------------------------|----------------------|---------------------------------------|-----------------------------------|---------------|
|                     |               | Randomisation process | Deviations from intended interventions | Missing outcome data | Measurement of the outcome            | Selection of the reported results | Overall       |
| Adverse events, any | Declercq 2021 | Low                   | Low                                    | Low                  | Some concerns due to lack of blinding | Low                               | Some concerns |
|                     | Tharaux 2021  | Low                   | Low                                    | Low                  | Some concerns due to lack of blinding | Low                               | Some concerns |

**Table 10** Risk of bias analysis for adverse events, grade 3-4

| Outcome                   | Study         | Risk of Bias Domain   |                                        |                      |                                       |                                   |               |
|---------------------------|---------------|-----------------------|----------------------------------------|----------------------|---------------------------------------|-----------------------------------|---------------|
|                           |               | Randomisation process | Deviations from intended interventions | Missing outcome data | Measurement of the outcome            | Selection of the reported results | Overall       |
| Adverse events, grade 3-4 | Declercq 2021 | Low                   | Low                                    | Low                  | Some concerns due to lack of blinding | Low                               | Some concerns |
