# Supplementary material
Source: PubMed Central journal article supplement (PMC9960437)
Supplement: 40001_2023_1072_MOESM6_ESM.pdf [file 40001_2023_1072_MOESM6_ESM.pdf]

## Supplementary Information No 6 Meta-analyses of Anakinra versus control

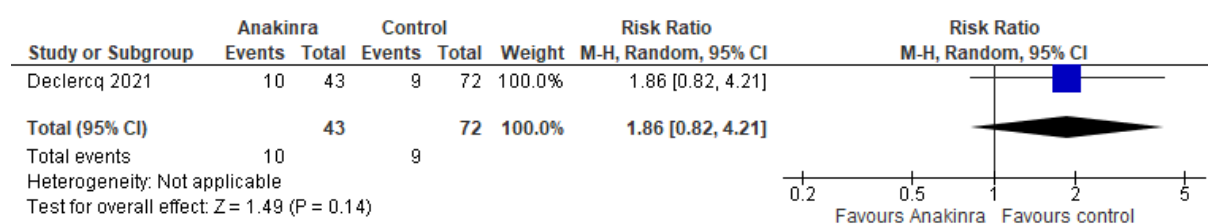

**Fig. 1** Forest plot describing the difference between Anakinra compared to placebo or standard care alone regarding 60-day mortality. M-H = Mantel-Haenszel.

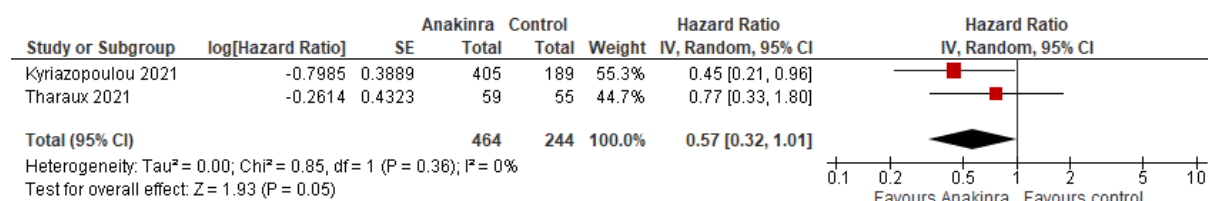

**Fig. 2** Forest plot describing the difference between Anakinra compared to placebo or standard care alone regarding 28-day mortality, time-to-event. M-H = Mantel-Haenszel.

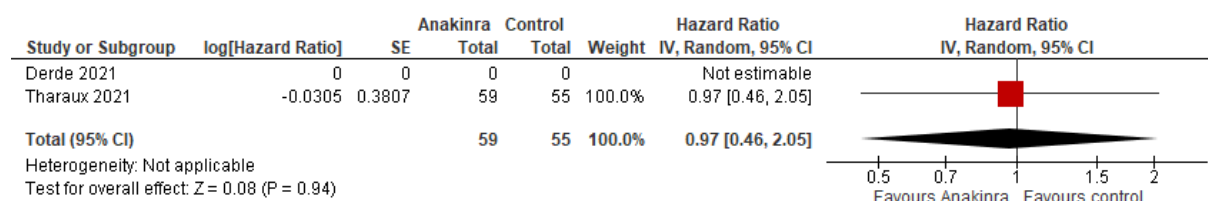

**Fig. 3** Forest plot describing the difference between Anakinra compared to placebo or standard care alone regarding 90-day mortality, time-to-event. M-H = Mantel-Haenszel.

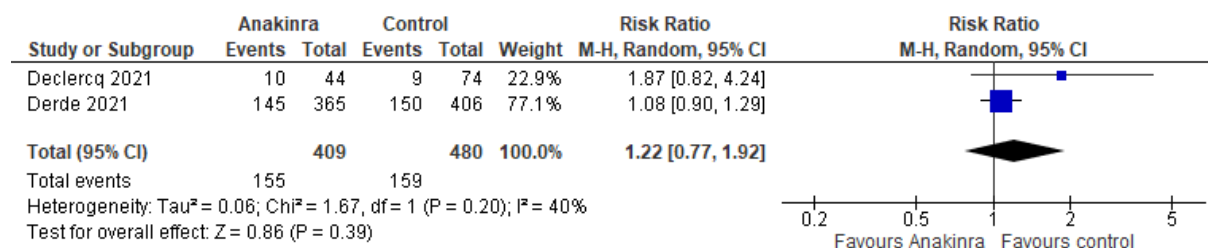

**Fig. 4** Forest plot describing the difference between Anakinra compared to placebo or standard care alone regarding mortality at hospital discharge. M-H = Mantel-Haenszel.

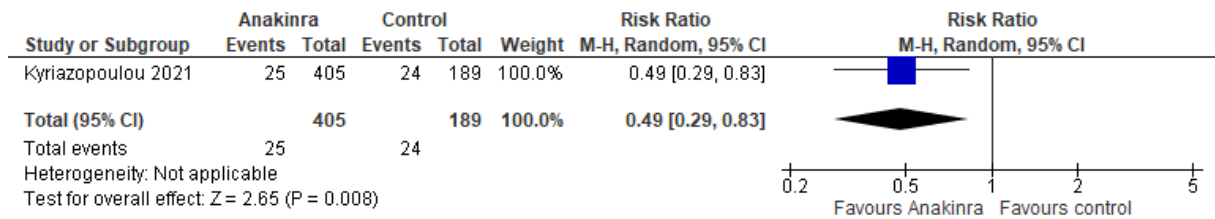

**Fig. 5** Forest plot describing the difference between Anakinra compared to placebo or standard care alone regarding worsening of clinical status in patients with suPAR  $\geq 6$  ng/ml. M-H = Mantel-Haenszel.

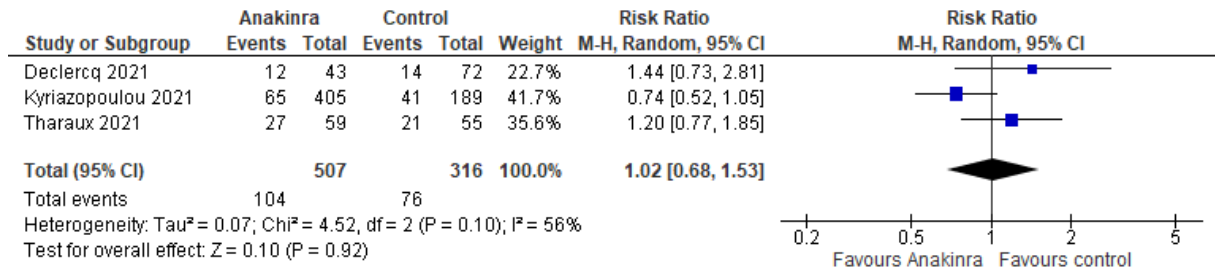

**Fig. 6** Forest plot describing the difference between Anakinra compared to placebo or standard care alone regarding serious adverse events. M-H = Mantel-Haenszel.

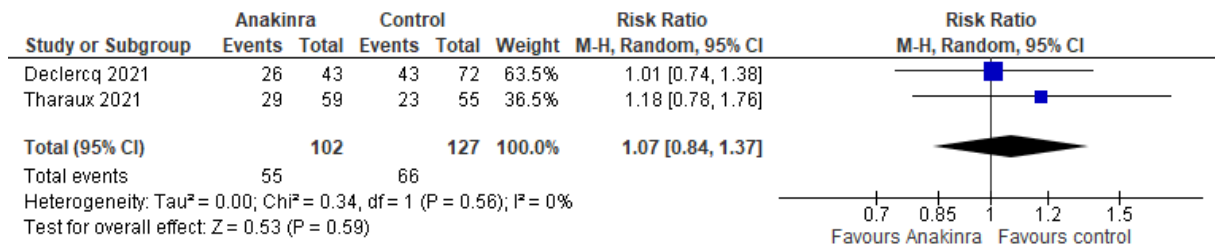

**Fig. 7** Forest plot describing the difference between Anakinra compared to placebo or standard care alone regarding any adverse events. M-H = Mantel-Haenszel.

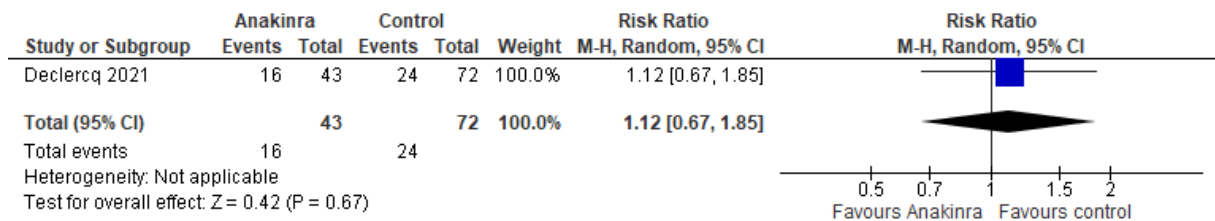

**Fig. 8** Forest plot describing the difference between Anakinra compared to placebo or standard care alone regarding adverse events, grade 3-4. M-H = Mantel-Haenszel.
